# Supplementary material for: Poor quality vital anti-malarials in Africa - an urgent neglected public health priority
Source: Malar J. 2011 Dec 13;10:352. doi: 10.1186/1475-2875-10-352 (PMC3262771; doi:10.1186/1475-2875-10-352)
Supplement: Additional file 2 — Summary of packaging, chemical and botanical analysis of anti-malarial samples. Results for tablets with AI chemical content < 90% or > 110% relative to the stated dose in red. [file 1475-2875-10-352-S2.PDF]

**Additional File 2. Summary of packaging, chemical and botanical analysis of antimalarial samples.** Results for tablets with API chemical content <90% or > 110% relative to the stated dose in red

| Sample Code<br>Sample location<br>Formulation<br>Classification                                                                | Packaging                                                                                                                                                                                                                                                                                   | Batch No<br>Mfg Date<br>Exp Date<br>{Putative<br>Types} | Mass spectrometry                                  | HPLC-UV<br>mg/tablet                   | XRD                                        | Botany                                                                                                                                 |
|--------------------------------------------------------------------------------------------------------------------------------|---------------------------------------------------------------------------------------------------------------------------------------------------------------------------------------------------------------------------------------------------------------------------------------------|---------------------------------------------------------|----------------------------------------------------|----------------------------------------|--------------------------------------------|----------------------------------------------------------------------------------------------------------------------------------------|
| <b>A. Counterfeit artesunate collected in Cameroon. All stated to contain 50mg artesunate/tablet</b>                           |                                                                                                                                                                                                                                                                                             |                                                         |                                                    |                                        |                                            |                                                                                                                                        |
| Cameroon S5/07<br>12x50mg white tablets<br>/blister with packet<br>and leaflet. Collected<br>July 2007<br><br>Counterfeit      | ‘Artesunat’ stated to be<br>manufactured by<br>‘Mekophar Chemical<br>Pharmaceutical Joint-<br>Stock Company’<br>‘Mekophar’ hologram on<br>packet<br>NAFDAC 04-3397<br>Reg. N°/N° VNA-2892-99<br>Bar code<br>8934574010511<br>‘Marketed by: Neros<br>Pharmaceuticals Ltd.,<br>Lagos Nigeria’ | 0170805<br>08/2005<br>08/2008                           | chloroquine <sup>α, β</sup> , sucrose <sup>α</sup> | 56.0, 58.0<br>mg/tablet<br>chloroquine | starch (C),<br>organic<br>compounds<br>(C) | Fungal spores, plant cells,<br>pollen grains of <i>Typha<br/>angustifolia</i> , charcoal, black<br>chips                               |
| Cameroon S5 1/08<br>12x50mg white tablets<br>/blister with packet<br>and leaflet. Collected<br>January 2008<br><br>Counterfeit | ‘Artesunat’ stated to be<br>manufactured by<br>‘Mekophar Chemical<br>Pharmaceutical Joint-<br>Stock Company’<br>‘Mekophar’ hologram on<br>packet<br>NAFDAC REG N° : 04-<br>3397<br>Reg. N°/N° VNA-2892-99<br>Bar code 8934574010511                                                         | 06027FX<br>07/2006<br>07/2009                           | chloroquine <sup>α, β</sup><br>no sucrose          | ----- <sup>IN</sup>                    | starch (M),<br>dextrose (A),<br>talc (T)   | Fungal spores, fern spores,<br><i>Pinus</i> pollen grain, traces of<br>charcoal, black chips, cellular<br>and amorphous organic debris |

|                                                                                                                       |                                                                                                                                                                                                                                                                           |                               |                                           |                     |                                          |                                                                                                                                                        |
|-----------------------------------------------------------------------------------------------------------------------|---------------------------------------------------------------------------------------------------------------------------------------------------------------------------------------------------------------------------------------------------------------------------|-------------------------------|-------------------------------------------|---------------------|------------------------------------------|--------------------------------------------------------------------------------------------------------------------------------------------------------|
|                                                                                                                       | Marketed by: Neros Pharmaceuticals Ltd., Lagos Nigeria                                                                                                                                                                                                                    |                               |                                           |                     |                                          |                                                                                                                                                        |
| Cameroon S5 2/08<br>12x50mg white tablets /blister with packet and leaflet. Collected January 2008<br><br>Counterfeit | ‘Artesunat’ stated to be manufactured by ‘Mekophar Chemical Pharmaceutical Joint-Stock Company’ and ‘Marketed by: Neros Pharmaceuticals Ltd., Lagos Nigeria’ ‘Mekophar’ hologram on packet<br>NAFDAC REG N° : 04-3397<br>Reg. N°/N° VNA-2892-99<br>Bar code 8934574010511 | 06027FX<br>07/2006<br>07/2009 | chloroquine <sup>α, β</sup><br>no sucrose | ----- <sup>IN</sup> | starch (M),<br>dextrose (A),<br>talc (T) | Fungal spores, fern spores, <i>Ulmus</i> pollen grain, cellular and amorphous debris                                                                   |
| Cameroon S5 3/08<br>12x50mg white tablets /blister with packet and leaflet. Collected January 2008<br><br>Counterfeit | ‘Artesunat’ stated to be manufactured by ‘Mekophar Chemical Pharmaceutical Joint-Stock Company’ and ‘Marketed by: Neros Pharmaceuticals Ltd., Lagos Nigeria’ ‘Mekophar’ hologram on packet<br>NAFDAC REG N° : 04-3397<br>Reg. N°/N° VNA-2892-99<br>Bar code 8934574010511 | 06027FX<br>07/2006<br>07/2009 | chloroquine <sup>α, β</sup><br>no sucrose | ----- <sup>IN</sup> | starch (M),<br>dextrose (A),<br>talc (T) | Fungal spores (~20 μm), rare Asteraceae (daisies), Chenopodiaceae and a folded tricolporate pollen grain, fungal hyphae, cellular and amorphous debris |
| Cameroon S5 4/08<br>12x50mg white tablets/blister with packet and leaflet.                                            | ‘Artesunat’ stated to be manufactured by ‘Mekophar Chemical Pharmaceutical Joint-                                                                                                                                                                                         | 06027FX<br>07/2006<br>07/2009 | chloroquine <sup>α, β</sup><br>no sucrose | ----- <sup>IN</sup> | starch (M),<br>dextrose (A),<br>talc (T) | Fungal spores, pollen grain?, charcoal, black chips, cellular and amorphous organic debris, plant cellular material                                    |

|                                                                                                                       |                                                                                                                                                                                                                                                                           |                                |                                           |                                        |                                             |                                                                                                                                            |
|-----------------------------------------------------------------------------------------------------------------------|---------------------------------------------------------------------------------------------------------------------------------------------------------------------------------------------------------------------------------------------------------------------------|--------------------------------|-------------------------------------------|----------------------------------------|---------------------------------------------|--------------------------------------------------------------------------------------------------------------------------------------------|
| Collected January 2008<br><br>Counterfeit                                                                             | Stock Company' and 'Marketed by: Neros Pharmaceuticals Ltd., Lagos Nigeria' 'Mekophar' hologram on packet<br>NAFDAC REG N° : 04-3397<br>Reg. N°/N° VNA-2892-99<br>Bar code 8934574010511                                                                                  |                                |                                           |                                        |                                             | (up to ~160 µm)                                                                                                                            |
| Cameroon S5 5/08<br>12x50mg white tablets /blister with packet and leaflet. Collected January 2008<br><br>Counterfeit | 'Artesunat' stated to be manufactured by 'Mekophar Chemical Pharmaceutical Joint-Stock Company' and 'Marketed by: Neros Pharmaceuticals Ltd., Lagos Nigeria' 'Mekophar' hologram on packet<br>NAFDAC REG N° : 04-3397<br>Reg. N°/N° VNA-2892-99<br>Bar code 8934574010511 | 06027FX<br>07/2006<br>07/2009  | chloroquine <sup>α, β</sup><br>no sucrose | ----- <sup>IN</sup>                    | starch (M), dextrose (A), talc (T)          | Fungal spores, charcoal, black chips, Myrtaceae and Poaceae (grass) pollen, cellular and amorphous organic debris, plant cellular material |
| Lao 07/24-1, 07/24-2, 07/24-3, 07/24-4<br>12x50mg white tablets /blister with packet and leaflet<br><br>Genuine       | 'Artesunat' stated to be manufactured by 'Mekophar Chemical Pharmaceutical Joint-Stock Company' No hologram<br>SDK/Reg.No: VNB-2339-04<br>Bar code 8934574010245                                                                                                          | 06004FN<br>07/08/06<br>08/2009 | artesanate                                | 52.0, 51.0, 52.0, 52.0, 52.0 mg/tablet | organic compounds (A), starch (M), talc (T) | Very rare charcoal, ? <i>Ulmus</i> , Cyatheaceae fern spores, Poaceae, Brassicaceae, Myrtaceae, Chenopodiaceae,                            |

|                                                                                                                                         |                                                                                                                                                                                                                                           |                                 |            |                                                                     |                                                      |                                                                                                                                                                                                                                             |
|-----------------------------------------------------------------------------------------------------------------------------------------|-------------------------------------------------------------------------------------------------------------------------------------------------------------------------------------------------------------------------------------------|---------------------------------|------------|---------------------------------------------------------------------|------------------------------------------------------|---------------------------------------------------------------------------------------------------------------------------------------------------------------------------------------------------------------------------------------------|
| Lao 07/25-1, 07/25-2,<br>07/25-3, 07/25-4<br><br>12x50mg white tablets<br>/blister with packet<br>and leaflet<br>Genuine                | ‘Artesunate’ stated to be<br>manufactured by<br>‘Mediplantex<br>358 Giai Phong Road –<br>Hanoi- Viet Nam’<br>No hologram<br>Reg.No.<br>VNA – 2820-05<br>Myanmar Reg. No:<br>0907A7304<br>Bar code<br>893504100035<br>Packet circular seal | 061106<br>31/11/06<br>11 2009   | artesunate | 50.5, 52.5, 48.0<br>mg/tablet                                       | starch (A),<br>talc (M)                              | Charcoal (some wood<br>derived), Poaceae, <i>Pinus</i> ,<br><i>Betula</i> , Palmae, <i>Trema</i> , <i>Alnus</i> ,<br><i>Fraxinus</i> , Cyperaceae<br>(sedges), Chenopodiaceae<br>pollen, Cyatheaceae and<br>Hymenophyllaceae fern<br>spores |
| Thai/Burma border<br>S 66<br>12x50mg white tablets<br>/blister with packet<br>and leaflet<br><br>Genuine                                | ‘Artesunat’ stated to be<br>manufactured for ‘AA<br>Medical Products Ltd., by<br>Mekophar, Vietnam’<br>MYN Reg.No. :<br>R0906A3639                                                                                                        | 07038FX<br>09/2007<br>09/2010   | artesunate | 52.5 mg/tablet                                                      | organic<br>compounds<br>(A), starch<br>(M), talc (T) | Poaceae with fungal spores<br>inside, <i>Pinus</i> , <i>Typha</i> ,<br>Apiaceae (carrot family),<br>Asteraceae, Chenopodiaceae<br>pollen                                                                                                    |
| Thai/Burma border<br>S 67<br>12x50mg white tablets<br>/blister with packet<br>and leaflet<br><br>Genuine                                | ‘Artesunate’ stated to be<br>manufactured for ‘AA<br>Medical Products Ltd., by<br>Mekophar, Vietnam’<br>MYN Reg.No. :<br>0406A3639                                                                                                        | 06038FX<br>09/2006<br>09/2009   | artesunate | 51.5 mg/tablet                                                      | organic<br>compounds<br>(A), starch<br>(M), talc (T) | Black chips, hyaline “cysts”,<br>Poaceae, ?Sapotaceae pollen                                                                                                                                                                                |
| Mek 10/03, 10/05<br>Genuine, direct from<br>manufacturer<br>12x50mg white tablets<br>/blister with packet<br>and leaflet<br><br>Genuine | ‘Artesunat’ stated to be<br>manufactured by<br>‘Mekophar Chemical<br>Pharmaceutical Joint-<br>Stock Co.’ and<br>marketed by : ‘NEROS<br>PHARMACUETICALS<br>LTD., LAGOS,<br>NIGERIA.’<br>‘Neros MKP’ hologram                              | 10005FX<br>25/03/10<br>25/03/13 | artesunate | artesunate 51.0,<br>50.0, 49.0 and<br>51.0, 51.0, 52.0<br>mg/tablet | -----                                                | -----                                                                                                                                                                                                                                       |

|                                                                                                                                                                                                                                                                                                                  |                                                                                         |                                                 |                                    |                                         |                                                             |                                                                                                                                                                                                                                                                                                                                                              |
|------------------------------------------------------------------------------------------------------------------------------------------------------------------------------------------------------------------------------------------------------------------------------------------------------------------|-----------------------------------------------------------------------------------------|-------------------------------------------------|------------------------------------|-----------------------------------------|-------------------------------------------------------------|--------------------------------------------------------------------------------------------------------------------------------------------------------------------------------------------------------------------------------------------------------------------------------------------------------------------------------------------------------------|
| <b>B. Counterfeit dihydroartemisinin (DHA) collected in Kenya and Nigeria.</b> All samples stated to contain 60mg DHA. All stated to be manufactured by 'Jiaxing Nanhu Pharmaceutical Co. Ltd. Jiaxing City, under license of Beijing Holley-Cotec Pharmaceuticals (PR China)' with stated trade name 'Cotecxin' |                                                                                         |                                                 |                                    |                                         |                                                             |                                                                                                                                                                                                                                                                                                                                                              |
| Kenya 07/01, Genuine<br>8x60mg white tablets/blister with packet and leaflet<br><br>Genuine                                                                                                                                                                                                                      | Tablet diameter 9.22 mm & thickness=3.98 mm                                             | MFD 10112006; EXP 11/2009; LOT 031106           | dihydroartemisinin <sup>α, β</sup> | 60.6 mg/tablet dihydroartemisinin       | organic compounds (C), lactose (M), glucose (M), starch (M) | Charcoal fragments, isolated plant cells, very rare fungal spores and hyphae, <i>Picea</i> , Malvaceae (probably <i>Hibiscus</i> spp.), Moraceae (cannabis family)                                                                                                                                                                                           |
| Kenya 07/02<br>8x60mg white tablets/blister with packet and leaflet<br><br>Counterfeit                                                                                                                                                                                                                           | Tablet diameter= 9.14 mm & thickness=5.27 mm. Differences in colour of packaging        | MFD 10042006; EXP 04/2009; LOT 030406           | No API detected                    | No dihydroartemisinin detected          | starch (A), dolomite (M), calcite (M), quartz (M)           | Abundant fine charcoal, rare fungal hyphae, occasional fungal cellular clusters and at least 4 different types of abundant, relatively large (up to 37 µm), mainly thick walled, brown fungal spores, totaling over 3,300 on the 22 slides (i.e. ~ 1000 grains per tablet). <i>Pinus</i> , Asteraceae, Chenopodiaceae, Fagaceae, <i>Quercus</i> ?, Rubiaceae |
| Private hospital, Nigeria <sup>1</sup><br>8x60mg white tablets/blister<br><br>Counterfeit                                                                                                                                                                                                                        | -----                                                                                   | MFD 2003; EXP November 2005<br>Lot Number 02110 | acetaminophen <sup>β</sup>         | No dihydroartemisinin detected (LSHTM)  | -----                                                       | -----                                                                                                                                                                                                                                                                                                                                                        |
| <b>C. Counterfeit halofantrine collected in West Africa and China. Tablets stated to contain 250mg halofantrine</b>                                                                                                                                                                                              |                                                                                         |                                                 |                                    |                                         |                                                             |                                                                                                                                                                                                                                                                                                                                                              |
| BN 694 Genuine<br>6 tablets/blister<br>Direct from manufacturer<br><br>Genuine                                                                                                                                                                                                                                   | 'Halfan' stated to be manufactured by 'SmithKline Beecham Laboratoires Pharmaceutiques' | 694<br>Mfg Apr02<br>Exp Apr05<br>{Genuine}      | halofantrine <sup>α, β</sup>       | 250 mg/tablet halofantrine <sup>γ</sup> | -----                                                       | -----                                                                                                                                                                                                                                                                                                                                                        |

|                                                           |                                                                                                                                                                                                                                                                                       |                                      |                               |                                |       |       |
|-----------------------------------------------------------|---------------------------------------------------------------------------------------------------------------------------------------------------------------------------------------------------------------------------------------------------------------------------------------|--------------------------------------|-------------------------------|--------------------------------|-------|-------|
| 2007 Sierra Leone<br>6 tablets/blister<br><br>Counterfeit | ‘Halfan’ stated to be manufactured by ‘SmithKline Beecham Laboratoires Pharmaceutiques’                                                                                                                                                                                               | 550<br>Mfg Jun99<br>Exp Jun02<br>{A} | artemisinin <sup>α, β</sup>   | 25.0 mg/tablet<br>artemisinin  | ----- | ----- |
| 2008 Sierra Leone<br>6 tablets/blister<br><br>Counterfeit | ‘Halfan’ stated to be manufactured by ‘SmithKline Beecham Laboratoires Pharmaceutiques’                                                                                                                                                                                               | 605<br>Mfg May00<br>Exp May03<br>{A} | artemisinin <sup>α, β</sup>   | 21.0 mg/tablet<br>artemisinin  | ----- | ----- |
| 2015 Nigeria<br>6 tablets/blister<br><br>Counterfeit      | ‘Halfan’ stated to be manufactured by ‘SmithKline Beecham Laboratoires Pharmaceutiques’                                                                                                                                                                                               | 613<br>Mfg Jan00<br>Exp Jan03<br>{A} | artemisinin <sup>α, β</sup>   | 35.0 mg/tablet<br>artemisinin  | ----- | ----- |
| 4020 Nigeria<br>6 tablets/blister<br><br>Counterfeit      | ‘Halfan’ stated to be manufactured by ‘SmithKline Beecham Laboratoires Pharmaceutiques’ Same blister design (apart from use of different batch data), same rudimentary ‘GSK’ holographic label and same leaflet as 4023. However, blister strip is not from the same tooling as 4023. | 709<br>Mfg Jun02<br>Exp Jun05<br>{D} | acetaminophen <sup>α, β</sup> | 317 mg/tablet<br>acetaminophen | ----- | ----- |

|                                                       |                                                                                                                                                                           |                                      |                                         |                                            |                                   |                                                                                                        |
|-------------------------------------------------------|---------------------------------------------------------------------------------------------------------------------------------------------------------------------------|--------------------------------------|-----------------------------------------|--------------------------------------------|-----------------------------------|--------------------------------------------------------------------------------------------------------|
| 4021 Nigeria<br>6 tablets/blister<br><br>Counterfeit  | ‘Halfan’ stated to be manufactured by ‘SmithKline Beecham Laboratoires Pharmaceutiques’<br>No holographic label                                                           | 550<br>Mfg Jun99<br>Exp Jun04<br>{A} | artemisinin <sup>α, β</sup>             | ~70 mg/tablet<br>artemisinin               | -----                             | -----                                                                                                  |
| 4023 Nigeria<br>6 tablets/blister<br><br>Counterfeit  | ‘Halfan’ stated to be manufactured by ‘SmithKline Beecham Laboratoires Pharmaceutiques’<br>See 4020                                                                       | 710<br>Mfg May02<br>Exp May05<br>{D} | acetaminophen <sup>α, β</sup>           | ~256 mg tablet<br>acetaminophen            | -----                             | -----                                                                                                  |
| 4024 Nigeria<br>6 tablets/blister<br><br>Counterfeit  | ‘Halfan’ stated to be manufactured by ‘SmithKline Beecham Laboratoires Pharmaceutiques’<br>Rudimentary ‘SB’ holographic label (enhancement to label present on 5106)      | 710<br>Mfg Jun02<br>Exp Jun05<br>{B} | acetaminophen <sup>β</sup>              | ~0.2 mg/tablet<br>acetaminophen            | -----                             | -----                                                                                                  |
| 5029 Tanzania<br>6 tablets/blister<br><br>Counterfeit | ‘Halfan’ stated to be manufactured by ‘SmithKline Beecham Laboratoires Pharmaceutiques’<br>Genuine sample but year of Mfg and Exp altered to extend shelf life by 2 years | 666<br>Mfg May03<br>Exp May06        | halofantrine hydrochloride <sup>ε</sup> | 250 mg/tablet<br>halofantrine <sup>γ</sup> | organic compounds (A), starch (C) | One fungal spore, rare, very small charcoal fragments, pitted plant cells, very common starch granules |

|                                                                           |                                                                                                                                                                                                                                                                            |                                      |                                 |                                |                                                              |                                                                                                                                                                                                                      |
|---------------------------------------------------------------------------|----------------------------------------------------------------------------------------------------------------------------------------------------------------------------------------------------------------------------------------------------------------------------|--------------------------------------|---------------------------------|--------------------------------|--------------------------------------------------------------|----------------------------------------------------------------------------------------------------------------------------------------------------------------------------------------------------------------------|
| 5070 Nigeria<br>6 tablets/blister<br><br>Counterfeit                      | ‘Halfan’ stated to be manufactured by ‘SmithKline Beecham Laboratoires Pharmaceutiques’. Same blister design as 5312 with rudimentary (but more sophisticated than 4020 & 4023) ‘GSK’ holographic label                                                                    | 735<br>Mfg Jan03<br>Exp Jan06        | acetaminophen <sup>ε β</sup>    |                                | talc (A), starch (M), quartz, chlorite and organic compounds | Fungal spores and hyphae, very small charcoal fragments, <i>Fagopyrum</i> , <i>Pinus</i> , <i>Artemisia</i> , Chenopodiaceae, <i>Sesamum</i> pollen grains. No wind blown grass pollen suggests seasonally arid area |
| 5106 Cameroon<br>6 tablets/blister<br><br>Counterfeit                     | ‘Halfan’ stated to be manufactured by ‘SmithKline Beecham Laboratoires Pharmaceutiques’ Very rudimentary ‘SB’ holographic label                                                                                                                                            | 690<br>Not listed<br>{D}             | acetaminophen <sup>α, β</sup>   | 302 mg/tablet<br>acetaminophen | -----                                                        | -----                                                                                                                                                                                                                |
| 5176 Democratic Republic of Congo<br>6 tablets/blister<br><br>Counterfeit | ‘Halfan’ stated to be manufactured by ‘SmithKline Beecham Laboratoires Pharmaceutiques’ Refined version of ‘GSK’ holographic label with increased clarity in comparison to those on 5070 & 5312 - with finer design elements e.g. micro text (see also 6227, 7103 & 7135E) | 768<br>Mfg Jan04<br>Exp Jan07<br>{B} | No API detected <sup>α, β</sup> | No API detected                | -----                                                        | -----                                                                                                                                                                                                                |

|                                                      |                                                                                                                                                                                                                                                                                                              |                                      |                               |                                 |       |       |
|------------------------------------------------------|--------------------------------------------------------------------------------------------------------------------------------------------------------------------------------------------------------------------------------------------------------------------------------------------------------------|--------------------------------------|-------------------------------|---------------------------------|-------|-------|
| 5312 Liberia<br>6 tablets/blister<br><br>Counterfeit | ‘Halfan’ stated to be manufactured by ‘SmithKline Beecham Laboratoires Pharmaceutiques’ Same design as 5070 with rudimentary (but more sophisticated than 4020 & 4023)’ GSK’ holographic label                                                                                                               | 735<br>Mfg Jan03<br>Exp Jan06<br>{E} | acetaminophen <sup>a, b</sup> | 58.0 mg/tablet<br>acetaminophen | ----- | ----- |
| 6227 China<br>6 tablets/blister<br><br>Counterfeit   | ‘Halfan’ stated to be manufactured by ‘SmithKline Beecham Laboratoires Pharmaceutiques’ Similar holographic label design to 5176, 7103 & 7135E. Same blister as 7073B apart from changed Mfg and Exp date data and different (enhanced detailed design elements on 7073B) version of ‘GSK’ holographic label | 803<br>Mfg Sep04<br>Exp Sep07<br>{C} | acetaminophen <sup>b</sup>    | < 1mg/tablet<br>acetaminophen   | ----- | ----- |
| 7103 Nigeria<br>6 tablets/blister<br><br>Counterfeit | ‘Halfan’ stated to be manufactured by ‘SmithKline Beecham Laboratoires Pharmaceutiques’ Similar holographic                                                                                                                                                                                                  | 781<br>Mfg Jan05<br>Exp Jan08        | dipyrone <sup>a, b</sup>      | -----                           | ----- | ----- |

|                                                       |                                                                                                                                                                                                                                           |                               |                                            |                                                             |                                                                  |                                                                                                                                                                                   |
|-------------------------------------------------------|-------------------------------------------------------------------------------------------------------------------------------------------------------------------------------------------------------------------------------------------|-------------------------------|--------------------------------------------|-------------------------------------------------------------|------------------------------------------------------------------|-----------------------------------------------------------------------------------------------------------------------------------------------------------------------------------|
|                                                       | label design to 5176, 6227 & 7135E                                                                                                                                                                                                        |                               |                                            |                                                             |                                                                  |                                                                                                                                                                                   |
| 7073b Nigeria<br>6 tablets/blister<br><br>Counterfeit | ‘Halfan’ stated to be manufactured by ‘SmithKline Beecham Laboratoires Pharmaceutiques’. Same blister design as 6227 apart from changed Mfg and Exp date data and different (more rudimentary on 6227) version of ‘GSK’ holographic label | 803<br>Mfg Sep06<br>Exp Sep09 | No API detected <sup>ε α</sup>             | -----                                                       | calcite (A),<br>Starch (C),<br>Talc (M),<br>organic<br>compounds | <i>Betula</i> pollen grain and<br><i>Stenochlaena</i> fern spore,<br>fungal spores, very small<br>charcoal fragments, calcite<br>slivers and starch grains,<br><i>Pinus</i> sacci |
| 7135a Nigeria<br>6 tablets/blister<br><br>Genuine     | ‘Halfan’ stated to be manufactured by ‘SmithKline Beecham Laboratoires Pharmaceutiques’                                                                                                                                                   | 820<br>Mfg Dec05<br>Exp Dec08 | halofantrine<br>hydrochloride <sup>ε</sup> | 250 mg/tablet<br>halofantrine<br>hydrochloride <sup>γ</sup> | organic<br>compounds<br>(A), starch<br>(C)                       | Rare, very small charcoal<br>fragments, pitted plant<br>vessels. No pollen                                                                                                        |
| 7135e Nigeria<br>6 tablets/blister<br><br>Counterfeit | ‘Halfan’ stated to be manufactured by ‘SmithKline Beecham Laboratoires Pharmaceutiques’ Similar holographic label design to 5176, 6227 & 7103                                                                                             | 817<br>Exp Dec05<br>Mfg Dec08 | pyrimethamine <sup>ε</sup>                 | -----                                                       | talc (A),<br>Starch (M),<br>chlorite                             | Pollen grains of Cyperaceae<br>and Chenopodiaceae, rare<br>fungal spores, rare, very small<br>charcoal and plant cellular<br>fragments                                            |

| <b>D. Counterfeit co-formulated dihydroartemisinin-piperaquine collected in China, destined for Africa. Tablets stated to contain co-formulated dihydroartemisinin-piperaquine (40mg &amp; 320mg). All stated to be manufactured by 'Zhejiang Holley Nanhu Pharmaceutical Group Ltd Under license of HolleyPharm' with stated trade name 'Duo-Cotecxin'</b> |                                                                                                               |                                  |                                                                  |                                                                                |                                                             |                                                                                                                                      |
|-------------------------------------------------------------------------------------------------------------------------------------------------------------------------------------------------------------------------------------------------------------------------------------------------------------------------------------------------------------|---------------------------------------------------------------------------------------------------------------|----------------------------------|------------------------------------------------------------------|--------------------------------------------------------------------------------|-------------------------------------------------------------|--------------------------------------------------------------------------------------------------------------------------------------|
| China 07/14, Genuine<br>8 blue tablets/blister with packet and leaflet<br>Direct from manufacturer<br><br>Genuine                                                                                                                                                                                                                                           | 'Composition per tablet' in English text on packet edge<br>Text transverse across blisterpack<br><br>Hologram | 0806<br>09082006<br>08/2008      | dihydroartemisinin <sup>α, β</sup> ,<br>piperaquine <sup>α</sup> | Dihydroartemisinin 38.0, 37.8 mg/tablet, 291, <b>286</b> piperaquine mg/tablet | starch (A), quartz (T), clay minerals (T), talc (M)         | Fungal spores, black chips, <i>Pinus</i> , Poaceae, Moraceae pollen grains, black synthetic thread                                   |
| China 07/15<br>Genuine<br>8 blue tablets/blister with packet and leaflet<br>Direct from manufacturer<br><br>Genuine                                                                                                                                                                                                                                         |                                                                                                               | 0806<br>09082006<br>08/2008      | dihydroartemisinin <sup>α, β</sup> ,<br>piperaquine <sup>α</sup> | Dihydroartemisinin 37.0, 37.7 mg/tablet, 303, 302 piperaquine mg/tablet        | starch (A), clay minerals (T), talc (M)                     | Rare <i>Cibotium</i> fern (Dicksoniaceae) spores, Oleaceae pollen, organic material (~160 μm), numerous black chips                  |
| China 07/16<br>Genuine<br>8 blue tablets/blister with packet and leaflet<br>Direct from manufacturer<br><br>Genuine                                                                                                                                                                                                                                         |                                                                                                               | 0806<br>09082006<br>08/2008      | dihydroartemisinin <sup>α, β</sup> ,<br>piperaquine <sup>α</sup> | Dihydroartemisinin 37.3, 37.7 mg/tablet, 292, 299 piperaquine mg/tablet        | starch (A), clay minerals (T), talc (M)                     | Fungal spores, <i>Cibotium</i> fern (Dicksoniaceae) spores, <i>Pinus</i> pollen, organic debris, numerous black chips                |
| China 07/17<br>Genuine<br>8 blue tablets/blister<br>Direct from manufacturer<br><br>Genuine                                                                                                                                                                                                                                                                 |                                                                                                               | 0806<br>09082006<br>08/2008      | dihydroartemisinin <sup>α, β</sup> ,<br>piperaquine <sup>α</sup> | Dihydroartemisinin 37.8, 37.0 mg/tablet, 295, 301 piperaquine mg/tablet        | starch (A), clay minerals (T), talc (M)                     | Fungal spores, <i>Cibotium</i> fern (Dicksoniaceae) spores, <i>Pinus</i> pollen, organic debris, numerous black chips                |
| China 07/18<br>8 blue tablets/blister with packet and leaflet<br><br>Counterfeit                                                                                                                                                                                                                                                                            | 'Composition par tablet', 'Dihydroartemisinin' and 'Piperaquine' in English text on packet edge (Fig 1E).     | 010106<br>11 04 2007<br>04/ 2009 | sildenafil <sup>α</sup>                                          | 18.4 mg/tablet sildenafil                                                      | starch (A), quartz (T), dolomite (M), calcite (T), talc (T) | Abundant fungal spores, rare <i>Cibotium</i> fern (Dicksoniaceae) spores, Poaceae pollen grain, organic debris, numerous black chips |
| China 07/19<br>8 blue tablets/blister with packet and leaflet                                                                                                                                                                                                                                                                                               |                                                                                                               | 010106<br>11 04 2007<br>04/ 2009 | sildenafil <sup>α</sup>                                          | 7.3 mg/tablet sildenafil                                                       | starch (C), quartz (M), dolomite                            | Abundant fungal spores, hyphae, rare <i>Cibotium</i> fern (Dicksoniaceae) spores,                                                    |

|                                                                                                                                                                   |                                                                                                                                                                                |                                  |                                                     |                                                                            |                                                             |                                                                                                                                                                                                                                                                         |
|-------------------------------------------------------------------------------------------------------------------------------------------------------------------|--------------------------------------------------------------------------------------------------------------------------------------------------------------------------------|----------------------------------|-----------------------------------------------------|----------------------------------------------------------------------------|-------------------------------------------------------------|-------------------------------------------------------------------------------------------------------------------------------------------------------------------------------------------------------------------------------------------------------------------------|
| Counterfeit                                                                                                                                                       | Text less clearly printed and longitudinal across blisterpack                                                                                                                  | 010106<br>11 04 2007<br>04/ 2009 | sildenafil <sup>a</sup>                             | 7.3 mg/tablet<br>sildenafil                                                | (C), calcite (M), talc (M)                                  | <i>Quercus</i> pollen grain, organic debris, charcoal, numerous black chips, fragments of an insect exoskeleton                                                                                                                                                         |
| China 07/20<br>8 blue tablets/blister with packet and leaflet<br><br>Counterfeit                                                                                  | Blisterpack 'Oral taken' incorrect English<br><br>No hologram<br><br>Packet MFD, EXP and LOT codes printed using dot matrix printer                                            | 010106<br>11 04 2007<br>04/ 2009 | sildenafil <sup>a</sup>                             | 9.6 mg/tablet<br>sildenafil                                                | starch (C), quartz (M), dolomite (C), calcite (M), talc (M) | Abundant fungal spores, hyphae, <i>Cibotium</i> fern (Dicksoniaceae) spores, <i>Quercus</i> and Chenopodiaceae pollen grains, organic debris, charcoal, numerous black chips, fragments of an insect exoskeleton, mammalian hair                                        |
| China 07/21<br>8 blue tablets/blister with packet and leaflet<br><br>Counterfeit                                                                                  |                                                                                                                                                                                | 010106<br>11 04 2007<br>04/ 2009 | sildenafil <sup>a</sup>                             | 6.1 mg/tablet<br>sildenafil                                                | starch (C), quartz (M), dolomite (C), calcite (M), talc (M) | Abundant fungal spores, hyphae, <i>Cibotium</i> fern (Dicksoniaceae) spores, <i>Quercus</i> , Chenopodiaceae, <i>Pinus</i> , Poaceae, ? <i>Artemisia</i> , ?Euphorbiaceae pollen grains, organic debris, charcoal, numerous black chips, blue and red synthetic threads |
| <b>E. Counterfeit artemether-lumefantrine collected in Ghana and Cameroon.</b> All tablets stated to contain co-formulated artemether-lumefantrine (20mg & 120mg) |                                                                                                                                                                                |                                  |                                                     |                                                                            |                                                             |                                                                                                                                                                                                                                                                         |
| Gh 09/01<br>8 yellow tablets/blister with packet and leaflet<br><br>Counterfeit                                                                                   | 'Coartem' stated to be manufactured by 'Beijing Novartis Pharma Ltd, Beijing, China for Novartis Pharma AG, Basle, Switzerland, under licence from the PRC.'<br>Packet text in | M1200<br>01 2009<br>05 2011      | Pyrimethamine<br>Yellow pigment of unknown identity | Pyrimethamine<br>6.2 & 7.7 mg/tablet<br>Yellow pigment of unknown identity | starch (A)                                                  | Remained yellow during acetolysis. Rare fungal hyphae and spores, Asteraceae and Poaceae pollen, other broken unidentifiable pollen                                                                                                                                     |

|                                                                                 |                                                                                                                                                                                                                                                                                                                                                                                                                |                             |                                                     |                                                                              |                         |                                                                                                                                                 |
|---------------------------------------------------------------------------------|----------------------------------------------------------------------------------------------------------------------------------------------------------------------------------------------------------------------------------------------------------------------------------------------------------------------------------------------------------------------------------------------------------------|-----------------------------|-----------------------------------------------------|------------------------------------------------------------------------------|-------------------------|-------------------------------------------------------------------------------------------------------------------------------------------------|
|                                                                                 | English, French, German and Spanish. German spelling error 'Unter 30°C lagern'. No blisterpack codes. Blisterpack corners angled                                                                                                                                                                                                                                                                               |                             |                                                     |                                                                              |                         |                                                                                                                                                 |
| Gh 09/02<br>8 yellow tablets/blister with packet and leaflet<br><br>Counterfeit | 'Coartem' stated to be manufactured by 'Beijing Novartis Pharma Ltd, Beijing, China for Novartis Pharma AG, Basle, Switzerland, under licence from the PRC.' Packet text in English, French, German and Spanish. Differences in packet size and colour. Text in different font. Correct German phrase "Unter 30°C lagern". Different widths and colours of packet colour tab bars, Blisterpack size different, | X0089<br>07 2008<br>08 2010 | Pyrimethamine<br>Yellow pigment of unknown identity | Pyrimethamine<br>24.0 & 25.0 mg/tablet<br>Yellow pigment of unknown identity | talc (A),<br>starch (M) | Remained yellow during acetolysis. Large quantity of starch grains that did not dissolve. Rare fungal remains. A few <i>Pinus</i> pollen grains |

|                                                                                                                                         |                                                                                                                                                                                                                                                                                   |                                                                            |                                |                                                                                   |            |                                                                                                                                                                                                                                                                                                                                                                                                                                                                                                                                                                      |
|-----------------------------------------------------------------------------------------------------------------------------------------|-----------------------------------------------------------------------------------------------------------------------------------------------------------------------------------------------------------------------------------------------------------------------------------|----------------------------------------------------------------------------|--------------------------------|-----------------------------------------------------------------------------------|------------|----------------------------------------------------------------------------------------------------------------------------------------------------------------------------------------------------------------------------------------------------------------------------------------------------------------------------------------------------------------------------------------------------------------------------------------------------------------------------------------------------------------------------------------------------------------------|
|                                                                                                                                         | codes smudged, foil duller and corners curved. Leaflet size different and paper colour different                                                                                                                                                                                  |                                                                            |                                |                                                                                   |            |                                                                                                                                                                                                                                                                                                                                                                                                                                                                                                                                                                      |
| <p>CAM 10/01</p> <p>Cameroon, from Novartis via INTERPOL</p> <p>6 yellow tablets/blister with packet and leaflet</p> <p>Counterfeit</p> | <p>‘Coartem’ stated to be manufactured by ‘Beijing Novartis Pharma Ltd, Beijing, China for Novartis Pharma AG, Basle, Switzerland, under licence from the PRC.’ Packet text in English, French, German and Spanish.</p> <p>NAFDAC Reg. No. 04-3275 Blisterpack corners angled</p> | <p>X1257<br/>06 2008<br/>05 2011</p> <p>Indistinct printing on blister</p> | Pyrimethamine and sulfadiazine | <p>No artemether or lumefantrine</p> <p>Pyrimethamine 148 &amp; 139 mg/tab</p>    | starch (A) | <p>A lot of very fine organic and non-organic debris. The organic debris consists of very finely disarticulated plant material, black specks and rare fragments of charcoal. The only spores and pollen are one <i>Pinus</i> grain and two Chenopodiaceae grains (<i>Chenopodium?</i>). Suggests an arid climate. The combination of <i>Pinus</i> plus chenopod pollen on their own are consistent with, but do not prove, a source in India. Fungal spores very common and varied in morphology - single celled, multicellular, clumps and variously ornamented</p> |
| <p>CAM 10/02</p> <p>Cameroon, from Novartis via INTERPOL</p> <p>6 yellow</p>                                                            | <p>‘Coartem’ stated to be manufactured by ‘Beijing Novartis Pharma Ltd, Beijing, China for Novartis Pharma AG, Basle,</p>                                                                                                                                                         | <p>X1257<br/>06 2008<br/>05 2011</p> <p>Indistinct printing on blister</p> | Pyrimethamine and sulfadiazine | <p>No artemether or lumefantrine</p> <p>Pyrimethamine 148 &amp; 145 mg/tablet</p> | starch (A) | <p>Identical to CAM 10/01 except contains much less finely dispersed organic and inorganic material and no chenopod pollen. One <i>Pinus</i> grain is present. Fungal spores and hyphae rare.</p>                                                                                                                                                                                                                                                                                                                                                                    |

|                                                                                                              |                                                                                                                                                                                                                 |                             |                          |                                                                              |                                                                                  |                                                                                                                                                        |
|--------------------------------------------------------------------------------------------------------------|-----------------------------------------------------------------------------------------------------------------------------------------------------------------------------------------------------------------|-----------------------------|--------------------------|------------------------------------------------------------------------------|----------------------------------------------------------------------------------|--------------------------------------------------------------------------------------------------------------------------------------------------------|
| tablets/blister with packet and leaflet<br><br>Counterfeit                                                   | Switzerland, under licence from the PRC.’ Packet text in English, French, German and Spanish. NAFDAC Reg. No. 04-3275 Blisterpack corners angled                                                                |                             |                          |                                                                              |                                                                                  |                                                                                                                                                        |
| Ken 06/01<br>From Novartis agent in Kenya<br>8 yellow tablets/blister with packet and leaflet<br><br>Genuine | ‘Coartem’ stated to be manufactured by ‘Beijing Novartis Pharma Ltd, Beijing, China for Novartis Pharma AG, Basle, Switzerland, under licence from the PRC.’ Packet text in English, French, German and Spanish | X0124<br>08 2005<br>07 2007 | Artemether, lumefantrine | Artemether 35.0 & 35.0 mg/tab and lumefantrine 314 & 317 mg/tablet           | starch (C), organic compounds (C), calcium sulphate (C), anhydrite (M), talc (T) | Turned dark brown during acetolysis. Very little seen, apart from some fragmentary conifer pollen grains and rare fungal remains. Similar to Lao 09/06 |
| NOV 10/43 Direct from manufacturer. 6 tablets/blister with packet and leaflet<br><br>Genuine                 | ‘Riamet’ stated to be manufactured by ‘Beijing Novartis Pharmaceutical Ltd.’                                                                                                                                    | X0095<br>09 2007<br>08 2009 | Artemether, lumefantrine | Artemether 19.3, 19.5, 19.5 mg/tablet & 120, 117, 117 lumefantrine mg/tablet | -----                                                                            | -----                                                                                                                                                  |

|                                                                                                                                  |                                                                                                                                                                              |                                  |                                        |                                                                                   |                                                                                  |                                                                                                                                                                                                                                                                                                                                                                                                                     |
|----------------------------------------------------------------------------------------------------------------------------------|------------------------------------------------------------------------------------------------------------------------------------------------------------------------------|----------------------------------|----------------------------------------|-----------------------------------------------------------------------------------|----------------------------------------------------------------------------------|---------------------------------------------------------------------------------------------------------------------------------------------------------------------------------------------------------------------------------------------------------------------------------------------------------------------------------------------------------------------------------------------------------------------|
| NOV 10/44. Direct from manufacturer. 6 tablets/blister with packet and leaflet<br><br>Genuine                                    | ‘Riamet’ stated to be manufactured by ‘Beijing Novartis Pharmaceutical Ltd.’                                                                                                 | X0102<br>11 2008<br>10 2010      | Artemether, lumefantrine               | Artemether 19.3, 19.4, 19.3 mg/tablet & 119, 120, 120 lumefantrine mg/tablet      | -----                                                                            | -----                                                                                                                                                                                                                                                                                                                                                                                                               |
| NOV 10/45. Direct from manufacturer. 6 tablets/blister with packet and leaflet<br><br>Genuine                                    | ‘Riamet’ stated to be manufactured by ‘Beijing Novartis Pharmaceutical Ltd.’                                                                                                 | X0106<br>11 2009<br>10 2011      | Artemether, lumefantrine               | Artemether 19.4, 19.6, 19.3 mg/tablet & 119, 120, 119 lumefantrine mg/tablet      | -----                                                                            | -----                                                                                                                                                                                                                                                                                                                                                                                                               |
| Lao 09/06, 09/07 & 09/09. From CMPE stock, Government of Laos sourced from Novartis 24 yellow tablets/blister<br><br>Genuine     | ‘Coartem’ stated as manufactured by ‘Novartis Pharmaceutical Corporation, Suffern, New York, USA for Novartis Pharma AG, Basle, Switzerland, under licence.’ Text in English | F1350<br>02 2009<br>01 2011      | Artemether, lumefantrine for Lao 09/09 | Artemether 45.2 & 44 mg/tablet and 287 & 280 lumefantrine mg/tablet for Lao 09/09 | starch (C), organic compounds (C), calcium sulphate (C), anhydrite (M), talc (T) | Lao 09/06 and Lao 09/07. Turned dark brown during acetolysis. Rare starch grains, very rare fungal hyphae. Conifer pollen, including <i>Pinus</i> and <i>Dacrydium pierrei</i> , Cyatheaceae and smooth unidentifiable monolet spores & pollen of <i>Betula</i> , <i>Trifolium</i> , <i>Alnus</i> , <i>Carpinus</i> , ? <i>Quercus</i> , Proteaceae, Rubiaceae (coffee family) & unidentifiable tricolporate grains |
| <b>F. Convenience sampling of antimalarials in the Democratic Republic of the Congo (DRC)</b>                                    |                                                                                                                                                                              |                                  |                                        |                                                                                   |                                                                                  |                                                                                                                                                                                                                                                                                                                                                                                                                     |
| DRC 08/01. Central market Kananga, Lulua Province, DRC. 6x100mg white artesunate tablets/blister with packet<br><br>Poor quality | ‘Marinate’ No manufacturers details on the packet or blister. Only GUJ/DRUGS/1407 *                                                                                          | RET. 008<br>JAN.2006<br>DEC.2008 | artesunate                             | artesunate 79.0, 88.0 mg/tablet                                                   | ----                                                                             | ----                                                                                                                                                                                                                                                                                                                                                                                                                |

|                                                                                                                                |                                                                                                                                                                                                   |                               |            |                                             |       |       |
|--------------------------------------------------------------------------------------------------------------------------------|---------------------------------------------------------------------------------------------------------------------------------------------------------------------------------------------------|-------------------------------|------------|---------------------------------------------|-------|-------|
| DRC 08/02. Central market Kananga, Lulua Province, DRC.<br>12x50mg white artesunate tablets/blister with packet<br><br>Genuine | ‘Artesunate’ Stated to be manufactured by ‘Mekophar Chemical Pharmaceutical Joint-Stock Company, HCMC Vietnam.’<br>‘Fabrique pour “AMT Inc. USA”<br>Text on packet in English, Spanish and French | 07011FX<br>03/2007<br>03/2010 | artesunate | artesunate 45.0, 52.5, 53.5, 52.5 mg/tablet | ----- | ----- |
| DRC 08/03. Central market Kananga, Lulua Province, DRC.<br>12x50mg white artesunate tablets/blister with packet<br><br>Genuine | ‘Artesunat’ Stated to be manufactured by ‘Mekophar Chemical Pharmaceutical Joint-Stock Company, HCMC Vietnam.’<br>‘Fabrique pour “AMT Inc. USA”<br>Text on packet in English, Spanish and French  | 07013FX<br>03/2007<br>03/2010 | artesunate | artesunate 49.0, 49.0, 55.0, 53.0 mg/tablet | ----- | ----- |
| DRC 08/04. Central market Kananga, Lulua Province, DRC.<br>6x100mg white artesunate tablet/blister with packet<br><br>Genuine  | ‘ARTSUN-100’ Stated to be ‘Made for euromedi Pharma 99, Carmelite Road, Middlesex, London’<br>Text in English and French<br>Code No. MP/DRUGS/25/23/20 01 *                                       | AK-02<br>FEB-07<br>JAN-10     | artesunate | artesunate 80.0, 90mg/tablet                | ----- | ----- |

|                                                                                                                                                                  |                                                                                                                                                                                                  |                               |                                                                            |                                                                                        |       |       |
|------------------------------------------------------------------------------------------------------------------------------------------------------------------|--------------------------------------------------------------------------------------------------------------------------------------------------------------------------------------------------|-------------------------------|----------------------------------------------------------------------------|----------------------------------------------------------------------------------------|-------|-------|
| DRC 08/05. Central market Kananga, Lulua Province, DRC.<br>12x50mg white artesunate tablet/blister with packet<br><br>Genuine                                    | ‘Sunat’<br>Stated to be manufactured by ‘SHALINA LABORATORIES PVT. LTD. 96, Maker Chamber VI, Nariman Point, Mumbai-Inde’<br>Code No. MH/DRUGS/KD-1392A *                                        | 006<br>NOV.06<br>SEP.09       | artesunate                                                                 | artesunate 45.0, 50.0, 54.0, 52.0 mg/tablet                                            | ----- | ----- |
| DRC 08/06. Central market Kananga, Lulua Province, DRC.<br>3x306.2mg amodiaquine tablets and 3x100mg white artesunate tablets/blister with packet<br><br>Genuine | ‘Sunat-A’<br>Stated to be manufactured by ‘SHALINA LABORATORIES PVT. LTD. 96, Maker Chamber VI, Nariman Point, Mumbai-Inde’<br>Code No. MH/DRUGS/KD-1392A *                                      | 002<br>OCT.07<br>SEP.10       | 1. amodiaquine <sup>α</sup><br>2. artesunate, disaccharide <sup>α, β</sup> | 1. Amodiaquine <b>242</b> , 288 mg/tablet<br>2. Artesunate <b>87.0</b> , 101 mg/tablet | ----- | ----- |
| DRC 08/07. Central market Kananga, Lulua Province, DRC.<br>12x50mg white artesunate tablets/blister with packet<br><br>Genuine                                   | ‘Artesunat’ Stated to be manufactured by ‘Mekophar Chemical Pharmaceutical Joint-Stock Company, HCMC Vietnam.’<br>‘Fabrique pour “AMT Inc. USA”<br>Text on packet in English, Spanish and French | 07014FX<br>03/2007<br>03/2010 | artesunate acid <sup>β</sup>                                               | artesunate 45.0, 54.0, 54.0, 52.0 mg/tablet                                            | ----- | ----- |

|                                                                                                                                                                              |                                                                                                                                                                                                                   |                                         |                                                               |                                                                          |       |                                                                                                                                                                                                                        |
|------------------------------------------------------------------------------------------------------------------------------------------------------------------------------|-------------------------------------------------------------------------------------------------------------------------------------------------------------------------------------------------------------------|-----------------------------------------|---------------------------------------------------------------|--------------------------------------------------------------------------|-------|------------------------------------------------------------------------------------------------------------------------------------------------------------------------------------------------------------------------|
| DRC 06/01, Kivu, DRC.<br>1 30ml bottle of<br>suspension with spoon,<br>packet and leaflet<br><br>Counterfeit                                                                 | ‘HALFAN’<br>Suspension<br>Stated to be<br>manufactured by<br>‘SmithKline Beecham<br>Laboratoire<br>Pharmaceutiques<br>Esplanade Charles de<br>Gaulle 92731<br>NANTERRE Cedex,’<br><br>NAFDAC REG NO.<br>04-2181 * | BN 3006<br>Mfg 07/2003<br>Exp 07/2006   | No API detected                                               | -----                                                                    | ----- | Abundant extremely<br>fine black material,<br>less than 0.25µm in<br>diameter. Rare fungal<br>remains, all of the<br>same type, and 8<br>pollen grains<br>including 5 small<br><i>Pinus</i> grains, and one<br>Poaceae |
| DRC 07/01, Kinshasa,<br>DRC. 6 x100mg<br>artesunate tablets/blister<br><br>Counterfeit                                                                                       | Astrinate on one face<br>of leaflet and Arinate<br>on reverse<br>Stated to be<br>‘Manufactured for<br>AT17 RUE<br>POISSONNIERS<br>75018 PARIS’ *                                                                  | Lot: 110705<br>Exp: 06/08<br>Mfg: 07/05 | artesunate                                                    | 88.5, 70.9 mg<br>artesunate/tablet                                       | ----  | ----                                                                                                                                                                                                                   |
| <b>G. Convenience sampling of antimalarials in West Africa</b>                                                                                                               |                                                                                                                                                                                                                   |                                         |                                                               |                                                                          |       |                                                                                                                                                                                                                        |
| BF 08/01<br>8 x coformulated<br>dihydroartemisinin-<br>piperaquine (40mg &<br>320mg) tablets/blister with<br>packet<br>Pharmacy, Ouagadougou,<br>Burkina Faso<br><br>Genuine | ‘DUO-COTECXIN’<br>Stated to be manufactured<br>by<br>‘Zhejiang Holley Nanhu<br>Pharmaceutical Group Co.<br>Ltd. Under license of<br>HolleyPharm’                                                                  | 020207<br>270022007<br>02/2009          | dihydroartemisinin <sup>β</sup> ,<br>piperaquine <sup>β</sup> | Dihydroartemisinin 53.0,<br>32.0 mg/tablet, piperaquine<br>240 mg/tablet | ----  | ----                                                                                                                                                                                                                   |
| BF 08/02<br>6 x 100mg artesunate<br>tablet/blister with packet                                                                                                               | ‘Arinate’<br>Stated to be manufactured<br>by ‘Dafra Pharma nv / sa                                                                                                                                                | 07C261<br>26 Mar 2007<br>03 2010        | artesunate <sup>β</sup>                                       | artesunate 98.0, 106<br>mg/tablet                                        | ----  | ----                                                                                                                                                                                                                   |

|                                                                                                           |                                                                                                                                                                                                                                                                                               |                                           |                         |                                                |       |       |
|-----------------------------------------------------------------------------------------------------------|-----------------------------------------------------------------------------------------------------------------------------------------------------------------------------------------------------------------------------------------------------------------------------------------------|-------------------------------------------|-------------------------|------------------------------------------------|-------|-------|
| Pharmacy, Ouagadougou,<br>Burkina Faso<br><br>Genuine                                                     | Turnhout (Belgium)' *                                                                                                                                                                                                                                                                         |                                           |                         |                                                |       |       |
| BF 08/03<br>6x50mg artesunate<br>tablets/blister<br>Pharmacy, Ouagadougou,<br>Burkina Faso<br><br>Genuine | 'Artesunate' Stated to be<br>manufactured by 'Ubithera,<br>Adam Pharm Comp Ltd,<br>Anhui, China' *                                                                                                                                                                                            | B. N.: 030906<br>MFG: 09/06<br>EXP: 08/09 | artesunate <sup>B</sup> | artesunate 44.0, 50.0<br>mg/tablet             | ----- | ----- |
| TOG 08/01<br>12x50mg artesunate<br>tablets/blister with packet<br>Pharmacy, Lome, Togo<br><br>Genuine     | 'Artesunate' Stated to be<br>manufactured by<br>'TONGMEI<br>LABORATOIRE,<br>Lomé-TOGO' *                                                                                                                                                                                                      | 010307<br>03 2007<br>03 2010              | artesunate <sup>B</sup> | artesunate 44.0, 51.0, 50.0,<br>48.0 mg/tablet | ----- | ----- |
| TOG 08/02<br>12x50mg artesunate<br>tablets/blister with packet<br>Pharmacy, Lome, Togo<br><br>Genuine     | ARTESUNATE' Stated to<br>be from 'Arthésis<br>Nyd Pharma, Genève-<br>Suisse. Manufactured by<br>Laboratoires Cipla Ltd<br>MH/DRUGS/845' *                                                                                                                                                     | K60703<br><br>07/2008                     | artesunate <sup>B</sup> | artesunate 50.0, 53.0, 55.0,<br>50.0 mg/tablet | ----- | ----- |
| BEN 08/01<br>12x50mg artesunate<br>tablets/blister with packet<br>Market, Cotonou, Benin<br><br>Genuine   | 'ARTESUNATE' Stated to<br>be manufactured by 'NSW<br>Pharmaceutical Co. Ltd.<br>Under the License of<br>Imperial Botanical CJS<br>INT'L.' Company logo on<br>packet similar design to<br>Guilin Pharmaceutical Co.<br>Ltd hologram but with<br>'IMPERIAL BOTANICAL'<br>across the mountains * | 070522<br>05 / 2007<br>04 / 2010          | artesunate <sup>B</sup> | artesunate 43.0, 47.0, 46.0,<br>46.0 mg/tablet | ----- | ----- |

|                                                                                                                                                                                     |                                                                                                                                                                                           |                                 |                                                                                                       |                                                                                                                                                    |       |       |
|-------------------------------------------------------------------------------------------------------------------------------------------------------------------------------------|-------------------------------------------------------------------------------------------------------------------------------------------------------------------------------------------|---------------------------------|-------------------------------------------------------------------------------------------------------|----------------------------------------------------------------------------------------------------------------------------------------------------|-------|-------|
| BEN 08/02<br>3x200mg white artesunate tablets and 3x pink tablets of 500mg sulfamethoxypyrazine and 25mg pyrimethamine/ blister with packet Pharmacy, Cotonou, Benin<br><br>Genuine | ‘AsunateDenk 200 Plus’ Stated to be manufactured by ‘Artesan Pharma GmbH & Co. KG, Lüchow, Germany for DENK PHARMA GmbH & Co. KG, Muenchen, Germany’ ‘Reg. No. NAFDAC...,ZAM 130/032-POM’ | 14861<br>08 / 2006<br>08 / 2009 | 1. artesunate <sup>α, β</sup><br>2. sulfamethoxypyrazine <sup>α</sup> , pyrimethamine <sup>α, β</sup> | 1. Artesunate 182, <b>230</b> mg/tablet<br>2. sulfamethoxypyrazine 495, 501, <b>718</b> mg/tablet, pyrimethamine <b>9.3</b> , 30.0, 36.0 mg/tablet | ----- | ----- |
| BEN 08/03<br>6 coformulated tablets of 100mg artesunate and amodiaquine 270mg (base)/blister with packet Pharmacy, Cotonou, Benin<br><br>Genuine                                    | ‘Coarsucam’ Stated to be manufactured for ‘sanofi Aventis, Casablanca, Morocco, manufactured by Maphar Casablanca, Morocco’                                                               | 5010<br>06 / 2007<br>06 / 2009  | artesunate <sup>α, β</sup> , amodiaquine <sup>α</sup>                                                 | artesunate 105, 99.0 and amodiaquine <b>227</b> , 265 mg/tablet                                                                                    | ----- | ----- |
| BEN 08/04<br>8x 60mg dihydroartemisinin tablets/blister with packet Pharmacy, Cotonou, Benin<br><br>Genuine                                                                         | ‘ARTEMAX’ Stated to be manufactured by ‘G.A. Pharmaceuticals S.A. Athens, Greece’ *                                                                                                       | 6060<br>1 2008<br>1 2010        | dihydroartemisinin <sup>β</sup>                                                                       | dihydroartemisinin 65.0, <b>28.0</b> mg/tablet                                                                                                     | ----- | ----- |
| BEN 08/05<br>3x4 x 50mg artesunate tablets, 4 tablets/ blister, three blisters with packet Pharmacy, Cotonou, Benin<br><br>Genuine                                                  | ‘Artemal-S’ Stated to be manufactured by ‘Plethico Pharmaceuticals Limited Indore (MP), India ML. 25/39/85’ *                                                                             | 7450<br>06/2007<br>05/2010      | artesunate <sup>β</sup>                                                                               | artesunate 46.8mg/tablet                                                                                                                           | ----- | ----- |

|                                                                                                                                          |                                                                                                                                                                            |                                   |                                                              |                                                                                                   |       |       |
|------------------------------------------------------------------------------------------------------------------------------------------|----------------------------------------------------------------------------------------------------------------------------------------------------------------------------|-----------------------------------|--------------------------------------------------------------|---------------------------------------------------------------------------------------------------|-------|-------|
| GH 08/01<br>12x 50mg artesunate tablets/blister with packet<br>Pharmacy, Tamale, Ghana<br><br>Genuine                                    | MALASATE 50'' Stated to be manufactured by 'ERNEST CHEMISTS LIMITED, Accra, Ghana' *                                                                                       | 0810G<br>10-07<br>10-10           | artesunate <sup>β</sup>                                      | artesunate 50.0, 47.0, 50.0, 47.0 mg/tablet                                                       | ----- | ----- |
| GH 08/02<br>3x4 x 50mg artesunate tablets, 4 tablets/blister, three blisterpacks with packet<br>Pharmacy, Tamale, Ghana<br><br>Genuine   | 'ARTESUNATE XL' Stated to be manufactured by 'XL LABORATORIES PVT. LTD, Bhiwadi, Rajasthan, India for KAMA INDUSTRIES LTD. ACCRA-NORTH, GHANA' Mfg. Lic. No. : Raj. 2059 * | 7002<br>05/2007<br>05/2010        | artesunate <sup>β</sup>                                      | artesunate 45.0, 48.5, 52.5, 50.0 mg/tablet                                                       | ----- | ----- |
| GH 08/03<br>12x50mg artesunate and 12x 150mg amodiaquine (base) tablets/blister<br>Pharmacy, Navrongo, Ghana<br><br>Genuine              | 'MALATEX' Stated to be manufactured by 'KINAPHARMA LIMITED Accra, Ghana' *                                                                                                 | B • N001<br><br>02/11             | 1. artesunate <sup>α, β</sup><br>2. amodiaquine <sup>α</sup> | 1. artesunate 47.0, 53.0, 53.0, 54.0 mg/tablet<br><br>2. amodiaquine 151, 140, 144, 152 mg/tablet | ----- | ----- |
| GH 08/04<br>6x100mg artesunate and 6x 300mg amodiaquine (base) tablets/blister with packet<br>Pharmacy, Bolgatanga, Ghana<br><br>Genuine | 'GSUANTE 100 KIT' Stated to be manufactured by 'GVS LABS Dombivili, India' Mfg. Lic. No.: KD-1562 A                                                                        | G0-01<br>16/01/2006<br>15/01/2009 | 1. artesunate <sup>α, β</sup><br>2. amodiaquine <sup>α</sup> | 1. artesunate 81.0, 90.0 mg/tablet<br>2. amodiaquine 260, 246 mg/tablet                           | ----- | ----- |

|                                                                                                                                             |                                                                                                                                                                                                 |                                     |                                                           |                                                              |       |       |
|---------------------------------------------------------------------------------------------------------------------------------------------|-------------------------------------------------------------------------------------------------------------------------------------------------------------------------------------------------|-------------------------------------|-----------------------------------------------------------|--------------------------------------------------------------|-------|-------|
| GH 08/05<br>3x50mg artesunate powder sachets and 3x150mg amodiaquine powder sachets in packet<br>Pharmacy, Bolgatanga, Ghana<br><br>Genuine | ‘CAMOSUNATE PED’<br>Stated to be manufactured by ‘DANPONG-ADAMS PHARMACEUTICAL INDUSTRY (GHANA) LIMITED ACCRA, GHANA’ *                                                                         | 0702006<br>02/07<br>02/10           | 1. artesunate <sup>β</sup><br>2. amodiaquine <sup>β</sup> | 1. artesunate 52.0 mg/tablet<br>2. amodiaquine 131 mg/tablet | ----- | ----- |
| GH 08/06<br>6x200mg artesunate tablets/blister with packet<br>Pharmacy, Kumasi, Ghana<br><br>Genuine                                        | ‘ARTENEX 200’<br>Stated to be manufactured by ‘KINAPHARMA LIMITED, Accra, Ghana’ *                                                                                                              | 007<br>SEP 05<br>SEP 09             | artesunate <sup>β</sup>                                   | artesunate 173, 212 mg/tablet                                | ----- | ----- |
| GH 08/07<br>8x60mg dihydroartemisinin tablets/blister with packet<br>Pharmacy, Kumasi, Ghana<br><br>Genuine                                 | ‘COTECXIN’. Stated to be manufactured by ‘Jiaxing Nanhu Pharmaceutical Co. Ltd. Jiaxing City, under license of Beijing Holley-Cotec Pharmaceuticals’                                            | 010106<br>19012006<br>01/2009       | dihydroartemisinin <sup>β</sup>                           | dihydroartemisinin 58.0, 13.0 mg/tablet                      | ----- | ----- |
| GH 08/08<br>12x50mg artesunate tablets/blister with packet<br>Pharmacy, Kumasi, Ghana<br><br>Genuine                                        | ‘ACUMAL’<br>Stated to be manufactured by ‘JCPL Pharma Pvt. Ltd, Jalgaon for KOJACH LIMITED KUMASI-GHANA’<br>Mfg. Lic. No. 514<br>For Batch No, Mfd and exp. Date packet states ‘See on Strip’ * | B/No.ET 504<br>DEC.2005<br>NOV.2009 | artesunate <sup>β</sup>                                   | artesunate 44.0, 45.0, 45.0, 46.0 mg/tablet                  | ----- | ----- |

|                                                                                                                                                                        |                                                                                                                                                                                                       |                                     |                                                           |                                                                                                                     |       |       |
|------------------------------------------------------------------------------------------------------------------------------------------------------------------------|-------------------------------------------------------------------------------------------------------------------------------------------------------------------------------------------------------|-------------------------------------|-----------------------------------------------------------|---------------------------------------------------------------------------------------------------------------------|-------|-------|
| GH 08/09<br>8x60mg<br>dihydroartemisinin<br>tablets/blister with packet<br>Pharmacy, Akisombo,<br>Ghana<br><br>Genuine                                                 | ‘ALAXIN’<br>Stated to be manufactured<br>by ‘GVS LABS,<br>Dombivili, INDIA’<br>Mgf. Lic. : KD 1562 A                                                                                                  | GO – 26<br>02/01/2007<br>01/01/2010 | dihydroartemisinin <sup>β</sup>                           | dihydroartemisinin 63.0,<br><b>37.0</b> mg/tablet                                                                   | ----- | ----- |
| GH 08/10<br>12x50mg artesunate<br>tablets/blister with packet<br>Pharmacy, Akisombo,<br>Ghana<br><br>Genuine                                                           | ‘ARTESUNATE’<br>Stated to be manufactured<br>by ‘Guilin Pharmaceutical<br>Co. Ltd., Guilin, Guangxi,<br>China’                                                                                        | 070506<br>05/2007<br>05/2010        | artesunate <sup>β</sup>                                   | artesunate 49.0, 50.0, 52.0,<br>53.0 mg/tablet                                                                      | ----- | ----- |
| GH 08/11<br>6x100mg artesunate<br>tablets/blister with packet<br>Pharmacy, Hohoe, Ghana<br><br>Genuine                                                                 | ‘GSUNATE FORTE’<br>Stated to be manufactured<br>by ‘BLISS GVS PHARMA<br>LTD. Palghar, Maharashtra,<br>INDIA’<br>Marketed by: ‘TOBINCO<br>PHARMACEUTICAS<br>LTD. Accra, Ghana’<br>Mfg. Lic. No. : 1040 | GE – 08<br>08 / 2007<br>07 / 2010   | artesunate <sup>β</sup>                                   | artesunate <b>88.0</b> , 100<br>mg/tablet                                                                           | ----- | ----- |
| GH 08/12<br>12x50mg white artesunate<br>tablets and 12x153.1mg<br>amodiaquine (base)<br>yellow tablets/blister with<br>packet<br>Pharmacy, Hohoe, Ghana<br><br>Genuine | ‘GSUNATE 24 KIT’<br>Stated to be manufactured<br>by ‘BLISS GVS PHARMA<br>LTD. Palghar, Maharashtra,<br>INDIA’<br>Mfg. Lic. No. : 1040                                                                 | KF – 05<br>12 / 2007<br>11 / 2010   | 1. artesunate <sup>β</sup><br>2. amodiaquine <sup>β</sup> | 1. artesunate <b>42.0</b> , 48.0,<br>51.0, 52.0 mg/tablet<br>2. amodiaquine <b>137</b> , 156,<br>162, 156 mg/tablet | ----- | ----- |

|                                                                                                                                                   |                                                                                                                                                                                                                      |                                                                                                                        |                                                              |                                                                        |       |       |
|---------------------------------------------------------------------------------------------------------------------------------------------------|----------------------------------------------------------------------------------------------------------------------------------------------------------------------------------------------------------------------|------------------------------------------------------------------------------------------------------------------------|--------------------------------------------------------------|------------------------------------------------------------------------|-------|-------|
| GH 08/13<br>6 Artesunate 100mg tablets and 6 amodiaquine 300mg tablets/blister with packet<br>Pharmacy, Ho, Ghana<br><br>Poor quality             | ‘AMONATE-400’<br>Stated to be manufactured for ‘Pharmanova Limited, Accra, Ghana.<br>Manufactured by: Atlantic Pharmaceuticals Limited Accra, Ghana’ *                                                               | 7004<br>10-07<br>10-10                                                                                                 | 1. artesunate <sup>α, β</sup><br>2. amodiaquine <sup>α</sup> | 1. artesunate 92.0, 103 mg/tablet<br>2. amodiaquine 237, 240 mg/tablet | ----- | ----- |
| GH 08/14<br>co-formulated 8 tablets of dihydroartemisinin 40mg and piperaquine 320mg/blister with packet<br>Pharmacy, Aflao, Ghana<br><br>Genuine | ‘P-ALAXIN’<br>Stated to be manufactured by ‘GVC LABS, Dombivili, INDIA’<br>Mfg Lic.: KD-1485A<br>Blisterpack M•I•KD•1485A                                                                                            | Packet<br>Batch No.:<br>GB-01<br>Mfg.Date : 08/2005<br>Exp. Date :<br>07/ 2008<br><br>Blister<br>GB•01.08/05.<br>07/08 | dihydroartemisinin, piperaquine, disaccharide                | dihydroartemisinin 49.0, 21.0 mg/tablet, piperaquine 243 mg/tablet     | ----- | ----- |
| GH 08/15<br>12x50mg artesunate tablets/blister with packet<br>Pharmacy, Bremen-Asikuma, Ghana<br><br>Poor quality                                 | ‘LEVER Artesunate’<br>Stated to be manufactured by<br>‘ADAMS PHARAMCEUTICAL (ANHUI) CO., LTD. ANHUI, CHINA<br>Division of Sunflower Int’l Group’<br>NAFDAC REG. NO.: 04-5865<br>Marketed by GENEITH GLOBAL LIMITED * | 040207<br>02/07<br>01/10                                                                                               | artesunate <sup>β</sup>                                      | artesunate 39.0, 43.0, 47.0, 47.0 mg/tablet                            | ----- | ----- |

|                                                                                                                                             |                                                                                                                   |                        |                                                           |                                                                               |       |       |
|---------------------------------------------------------------------------------------------------------------------------------------------|-------------------------------------------------------------------------------------------------------------------|------------------------|-----------------------------------------------------------|-------------------------------------------------------------------------------|-------|-------|
| GH 08/16<br>3x50mg artesunate and<br>3x153mg<br>amodiaquine (base) tablets<br>/blister with packet<br>Pharmacy, Accra, Ghana<br><br>Genuine | ‘ARSUCAM’<br>Stated to be manufactured<br>by ‘Sanofi~synathelabo<br>Manufacturer MAPHAR –<br>Casablanca –Morocco’ | 0244<br>02/06<br>02/08 | 1. artesunate <sup>β</sup><br>2. amodiaquine <sup>β</sup> | 1. artesunate 47.0, 55.0<br>mg/tablet<br>2. amodiaquine 134, 144<br>mg/tablet | ----- | ----- |
|---------------------------------------------------------------------------------------------------------------------------------------------|-------------------------------------------------------------------------------------------------------------------|------------------------|-----------------------------------------------------------|-------------------------------------------------------------------------------|-------|-------|

\* Genuine sample from manufacturer not available for comparison <sup>α</sup>Active Pharmaceutical Ingredient (API) detected by DESI-MS, <sup>β</sup>API verified by DART-MS, <sup>γ</sup> GSK tablets are manufactured to 250mg of halofantrine hydrochloride and this was not verified by HPLC in this work, <sup>ε</sup>API detected by Fourier Transform Infra Red spectroscopy (FTIR) and verified when necessary by high performance liquid chromatography with electrospray ionisation and mass spectrometry detection (HPLC-ESI-MS)

A (abundant, > 60%), C (common, 20-60%), M (minor, 5-20%), T (trace < 5%). Clay minerals are probably smectite and chlorite.

HPLC-UV = high performance liquid chromatography with ultraviolet detection, XRD = X-ray diffraction, GSK = GlaxoSmithKline, SB = SmithKline Beecham, LSHTM – HPLC analysis performed by HK at London School of Hygiene and Tropical Medicine – see Ioset & Kaur (2009), IN = insufficient material left for analysis

<sup>1</sup> Reported in Ioset & Kaur (2009)

Meta-alunogen is aluminium sulphate hydrate  
Acetaminophen is paracetamol
